# Supplementary material for: The ALK/ROS1 Inhibitor PF-06463922 Overcomes Primary Resistance to Crizotinib in ALK-Driven Neuroblastoma
Source: Oxford University Press journal article supplement (doi:10.1158/2159-8290.cd-15-1056), 2015-11-10
Supplement: 21598290cd151056-sup-154917_2_supp_0_nxkx1z.pdf [file 21598290cd151056-sup-154917_2_supp_0_nxkx1z.pdf]

1 **SUPPLEMENTARY TABLE LEGENDS**

2 **Table S1. PF-06463922 is potent against *ALK*-mutated NB cell lines *in vitro*.** Mean (n=3) IC<sub>50</sub>  
3 values (± SD) for crizotinib and PF-06463922 are listed for 10 NB cell lines harboring the indicated  
4 *ALK* aberrations, plus one NSCLC cell line (NCI-H3122). Fold increases in the IC<sub>50</sub> values with  
5 crizotinib over those measured for PF-06463922 are also listed in the right-most column.

6

7

8 **SUPPLEMENTARY FIGURE LEGENDS**

9 **Supplemental Figure 1.** PF-06463922 is well tolerated in mice. Average mouse body weight  
10 over 6-9 weeks of continuous treatment with vehicle (black curves and diamonds),  
11 100 mg/kg/day crizotinib (blue curves and triangles), or 10 mg/kg/day PF-06463922 (red curves  
12 and squares) for mice with: **A**, COG-N-453x PDXs; **B**, Felix-PDX xenografts; **C**, SH-SY5Y  
13 xenografts; and **D**, NB-1643 xenografts.

14

15 **Supplemental Figure 2.** *In vivo* effects of crizotinib and PF-06463922 on event-free survival  
16 (EFS) in neuroblastoma PDX and xenograft models. Female CB17 SCID mice bearing:  
17 **A**, COG-N-453x (ALK-F1174L); **B**, Felix-PDX (ALK-F1245C); **C**, SH-SY5Y (ALK-F1174L); and  
18 **D**, NB-1643 (ALK-R1275Q) were treated with vehicle (black curves and diamonds),  
19 100 mg/kg/day crizotinib (blue curves and triangles), or 10 mg/kg/day PF-06463922 (red curves  
20 and squares). EFS is plotted for the period during treatment (as in Fig. 2) and for a period of 4-7  
21 weeks after cessation of therapy. Remarkably, no discernible tumor growth could be detected  
22 in any of the PF-06463922-treated mice during the period of monitoring.

23

24 **Supplemental Figure 3.** *In vivo* efficacy studies comparing PF-06463922 treatment at  
25 10 mg/kg/day (5 mg/kg BID) and 3 mg/kg/day (1.5 mg/kg BID) with crizotinib treatment at  
26 100 mg/kg QD in: **A**, Felix-PDX xenografts and **B**, SH-SY5Y xenografts. Tumor volumes are

27 plotted over 6 weeks of continuous treatment (Median  $\pm$  S.E.M., n=10 for each data point), as  
28 are Kaplan-Meier survival curves. A mixed-effects linear model was used to assess statistical  
29 significance analysis of tumor growth delay, and EFS Kaplan-Meier curves were compared by  
30 using log-rank test, \* p<0.05 (see Table 1).
