# Supplementary figures and images for: The ALK/ROS1 Inhibitor PF-06463922 Overcomes Primary Resistance to Crizotinib in ALK-Driven Neuroblastoma
Source: Oxford University Press journal article supplement (doi:10.1158/2159-8290.cd-15-1056), 2015-11-10

Figure S1

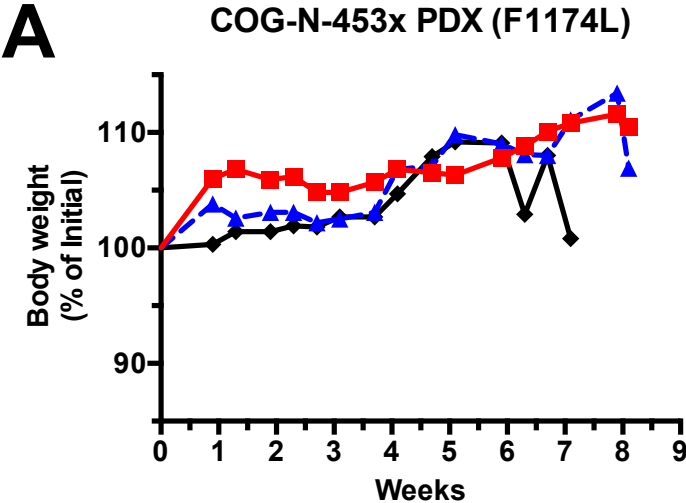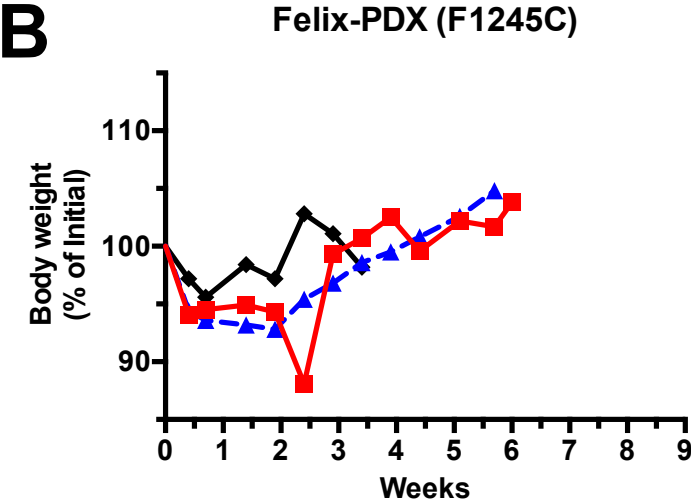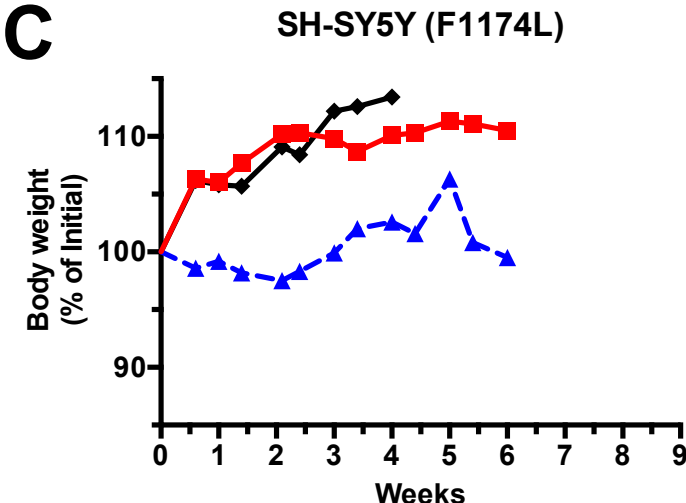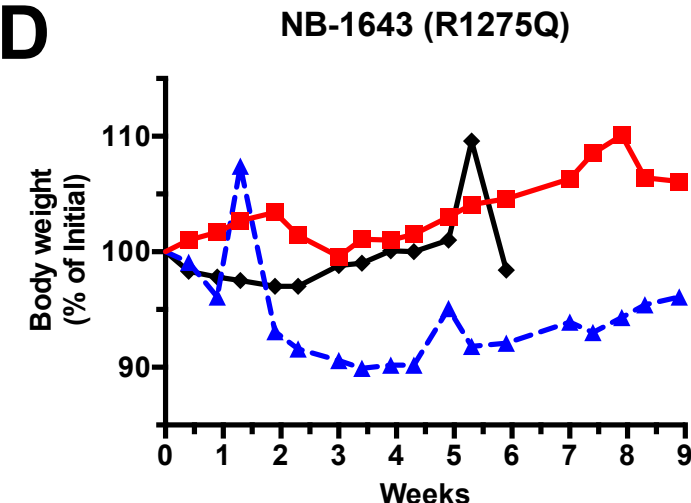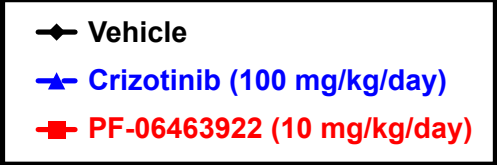

Supplement: 21598290cd151056-sup-154917_2_supp_0_nxkhys.pdf [file 21598290cd151056-sup-154917_2_supp_0_nxkhys.pdf]

Figure S3

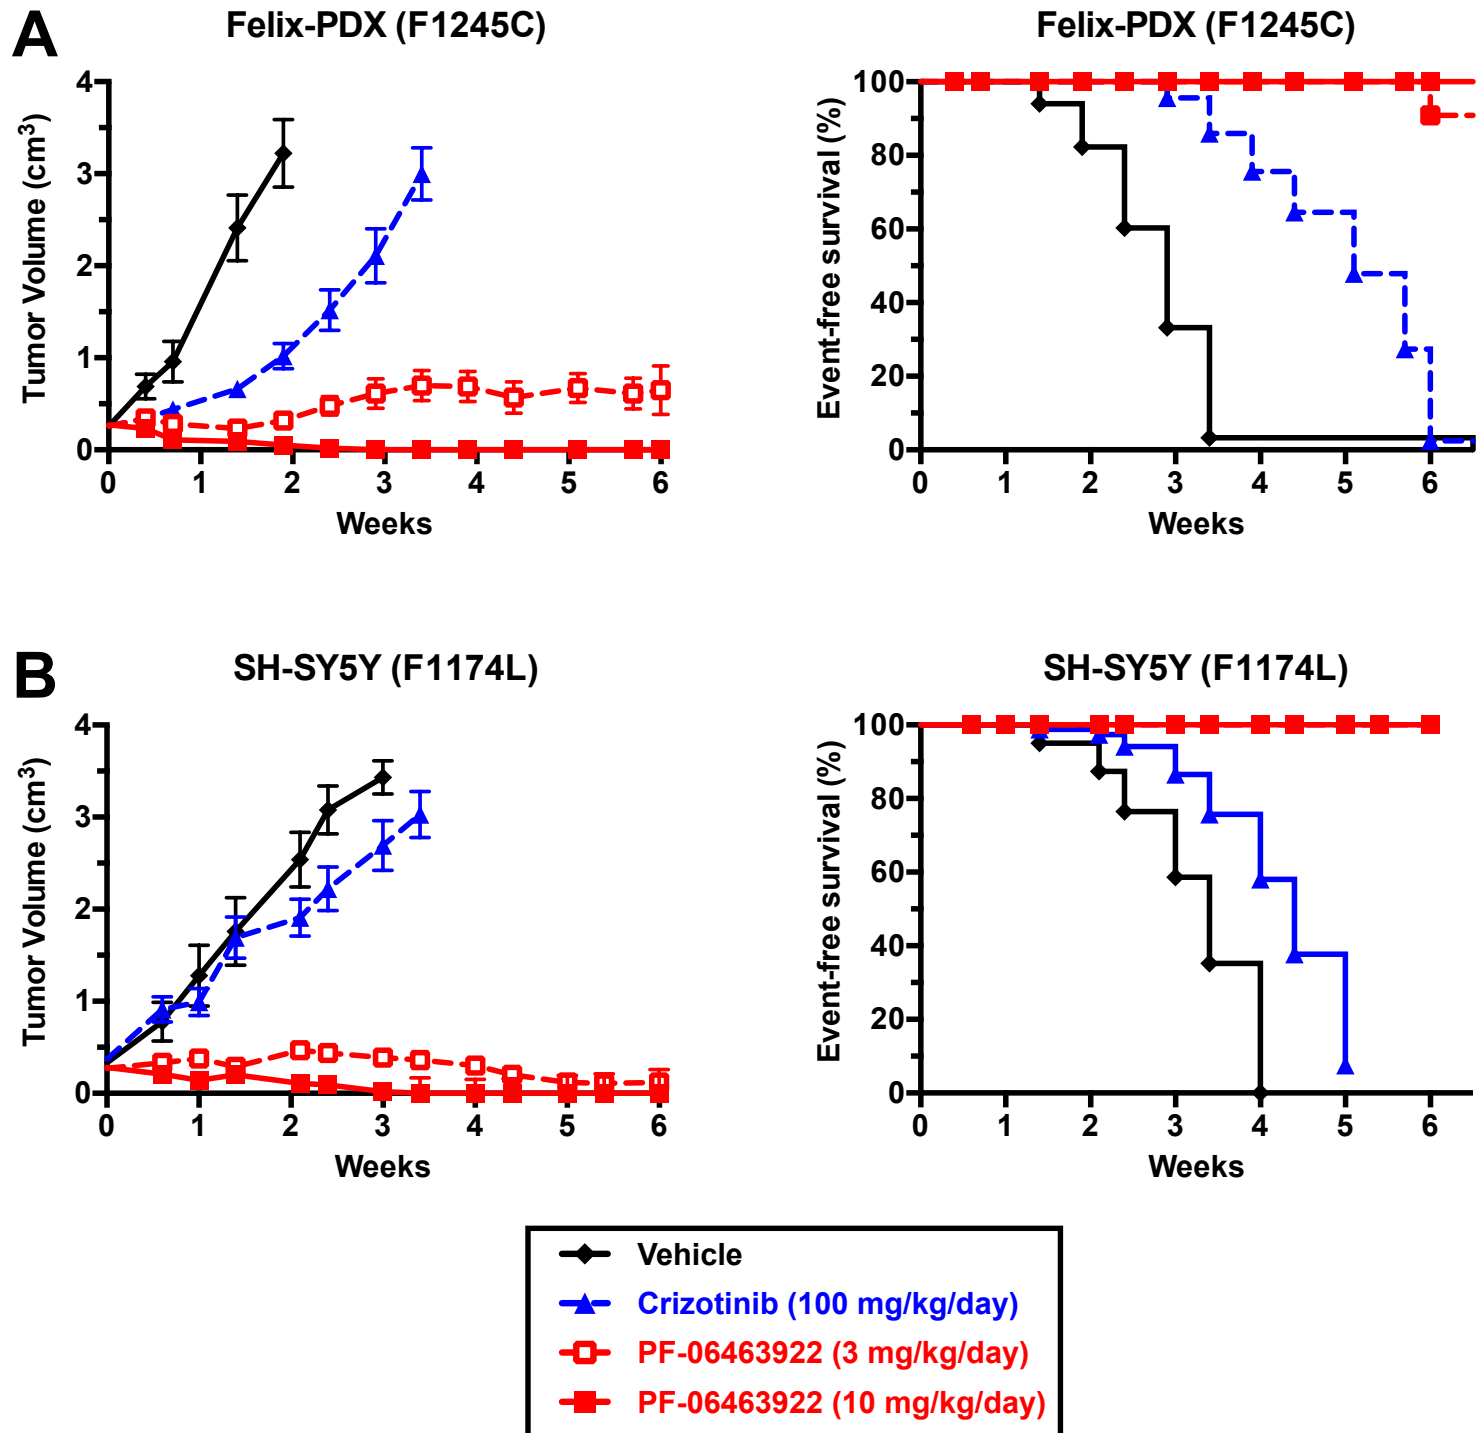

Supplement: 21598290cd151056-sup-154917_2_supp_0_nxkhzb.pdf [file 21598290cd151056-sup-154917_2_supp_0_nxkhzb.pdf]
